# Supplementary material
Source: HighWire-hosted journal article supplement (https://erj.ersjournals.com/content/54/4/1900407)
Supplement: inline-supplementary-material-9 [file inline-supplementary-material-9.pdf]

**Supplementary Table S8.** Mixed logistic regression for the association between viral infections and having taken the study medication before AECOPD

| Variable          | Characteristic / Factor | Value   | ESTIMATE | STDE | Odds ratio | 95%CI        | p-value | p-value overall effect |
|-------------------|-------------------------|---------|----------|------|------------|--------------|---------|------------------------|
| All Viruses       | Intercept               | I       | -0.44    | 1.50 |            |              | 0.77    |                        |
|                   | Patient's sex           | male    | 0.22     | 0.38 | 1.24       | 0.58 - 2.67  | 0.57    | 0.57                   |
|                   |                         | female  | 0        |      |            |              |         |                        |
|                   | age                     | 1 year  | <0.01    | 0.02 | 1.00       | 0.96 - 1.04  | 0.94    | 0.94                   |
|                   | medication              | None    | -0.38    | 0.51 | 0.68       | 0.24 - 1.92  | 0.47    | 0.34                   |
|                   |                         | Placebo | 0.31     | 0.65 | 1.37       | 0.37 - 5.07  | 0.63    |                        |
| ICS/LABA          |                         | 0       |          |      |            |              |         |                        |
| Coronaviruses     | Intercept               | I       | 0.26     | 2.47 |            |              | 0.91    |                        |
|                   | Patient's sex           | male    | -0.43    | 0.61 | 0.65       | 0.19 - 2.20  | 0.48    | 0.48                   |
|                   |                         | female  | 0        |      |            |              |         |                        |
|                   | age                     | 1 year  | -0.04    | 0.03 | 0.96       | 0.90 - 1.02  | 0.18    | 0.18                   |
|                   | Study medication        | None    | 0.46     | 1.10 | 1.59       | 0.17 - 14.38 | 0.68    | 0.39                   |
|                   |                         | Placebo | 1.31     | 1.19 | 3.70       | 0.34 - 40.55 | 0.28    |                        |
| ICS/LABA          |                         | 0       |          |      |            |              |         |                        |
| Influenza         | Intercept               | I       | -3.40    | 2.77 |            |              | 0.22    |                        |
|                   | Patient's sex           | male    | 0.04     | 0.69 | 1.04       | 0.26 - 4.18  | 0.96    | 0.96                   |
|                   |                         | female  | 0        |      |            |              |         |                        |
|                   | age                     | 1 year  | <0.01    | 0.04 | 1.00       | 0.93 - 1.08  | 0.89    | 0.89                   |
|                   | Study medication        | None    | 0.48     | 1.12 | 1.62       | 0.17 - 15.16 | 0.66    | 0.79                   |
|                   |                         | Placebo | -0.15    | 1.50 | 0.86       | 0.04 - 17.38 | 0.92    |                        |
| ICS/LABA          |                         | 0       |          |      |            |              |         |                        |
| Para-influenza    | Intercept               | I       | 4.76     | 4.78 |            |              | 0.32    |                        |
|                   | Patient's sex           | male    | -2.16    | 1.23 | 0.11       | 0.01 - 1.40  | 0.09    | 0.09                   |
|                   |                         | female  | 0        |      |            |              |         |                        |
|                   | age                     | 1 year  | -0.09    | 0.07 | 0.91       | 0.80 - 1.05  | 0.19    | 0.19                   |
|                   | Study medication        | None    | -2.10    | 1.17 | 0.12       | 0.01 - 1.29  | 0.08    | 0.21                   |
|                   |                         | Placebo | -1.10    | 1.34 | 0.33       | 0.02 - 4.87  | 0.41    |                        |
| ICS/LABA          |                         | 0       |          |      |            |              |         |                        |
| Rhino-Enterovirus | Intercept               | I       | -4.00    | 2.14 |            |              | 0.06    |                        |
|                   | Patient's sex           | male    | 1.16     | 0.60 | 3.18       | 0.96 - 10.58 | 0.06    | 0.06                   |
|                   |                         | female  | 0        |      |            |              |         |                        |
|                   | age                     | 1 year  | 0.03     | 0.03 | 1.03       | 0.97 - 1.09  | 0.35    | 0.35                   |
|                   | Study medication        | None    | -0.65    | 0.67 | 0.52       | 0.14 - 2.00  | 0.34    | 0.62                   |
|                   |                         | Placebo | -0.42    | 0.91 | 0.66       | 0.10 - 4.08  | 0.65    |                        |
| ICS/LABA          |                         | 0       |          |      |            |              |         |                        |
